# Supplementary material for: External Validation of SAFE Score to Predict Atrial Fibrillation Diagnosis after Ischemic Stroke: A Retrospective Multicenter Study
Source: Stroke Res Treat. 2023 Dec 7;2023:6655772. doi: 10.1155/2023/6655772 (PMC10721350; doi:10.1155/2023/6655772)
Supplement: Supplementary Materials — In the Supplementary material, there is a gender analysis, with Table S1 showing the baseline characteristics of the patients by gender and Figure S1 showing the ROC curves by gender in the external cohort and the comparison of both AUCs. [file 6655772.f1.zip]

Archive with 2 entries (2 files):
- SRT Revised STROBE checklist SAFE external validation.docx
- SUPPLEMENTARY MATERIAL.docx
